# Supplementary material
Source: Springer Nature journal article supplement (https://www.springermedizin.de/resource/supplementary/12888_2008_680_MOESM1_ESM.pdf/9478142)

a:

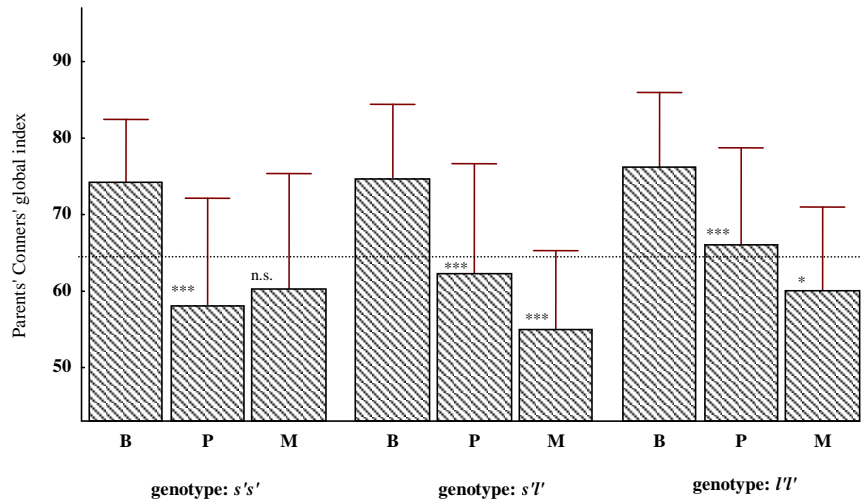

b:

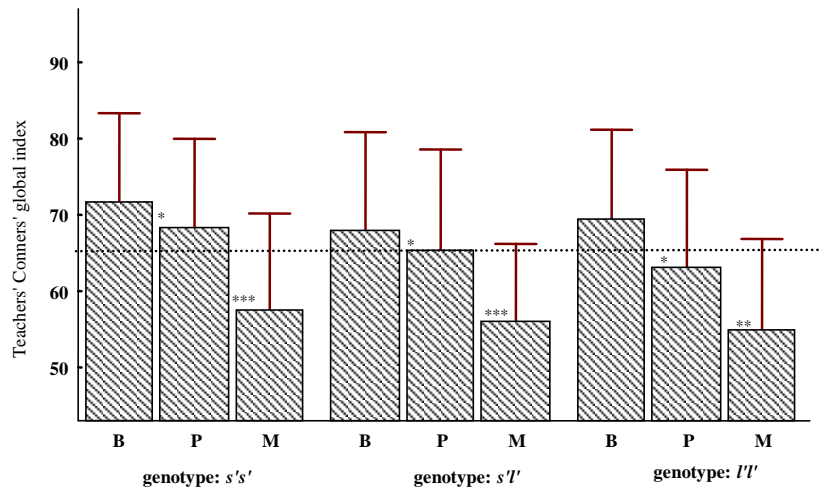

Supplement: MOESM1 [file 9478142]
